# Supplementary material
Source: ML conference proceedings conference paper supplement (https://openreview.net/forum?id=B0gGoUIiqx9)

Histogram of the answers' sizes for questions with two winners

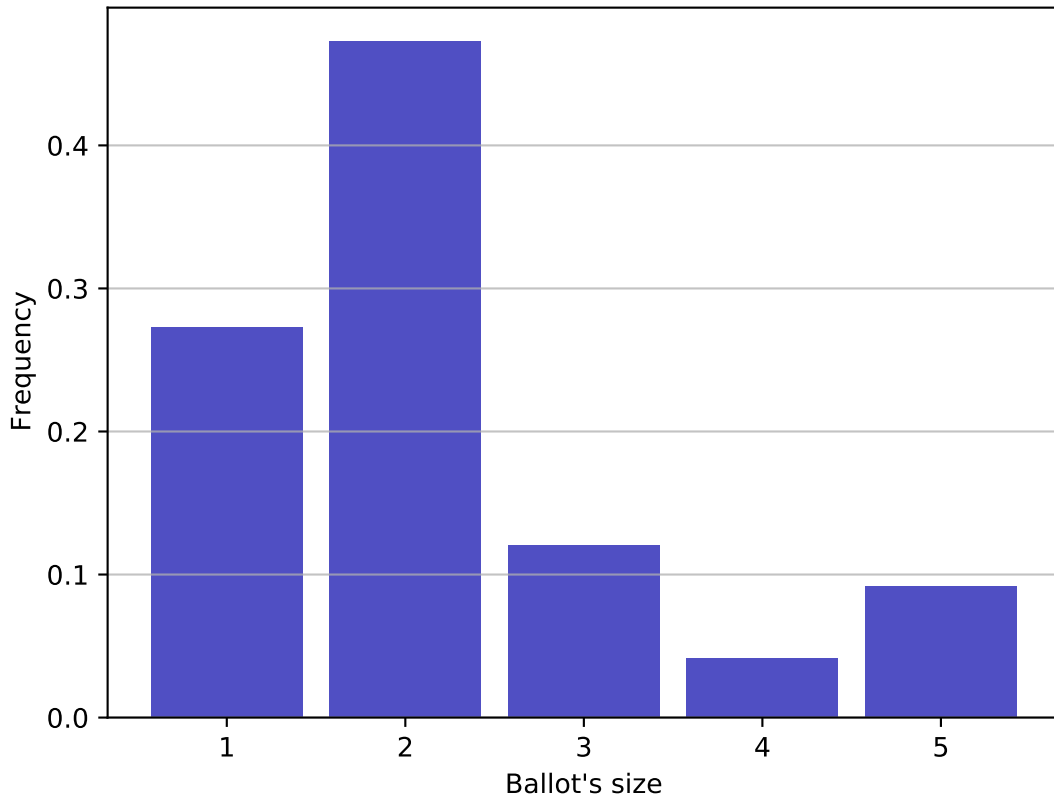

Supplement: supplementary_material [file attachment]

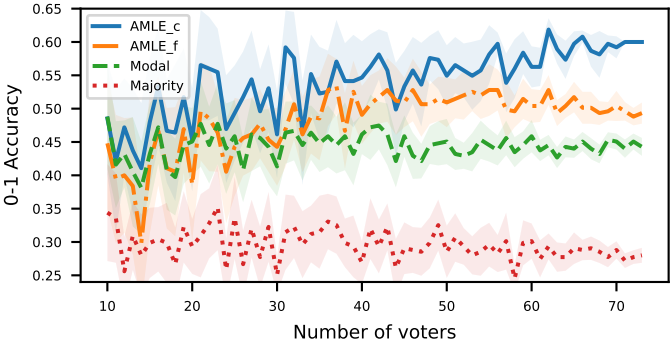

Supplement: supplementary_material [file attachment]

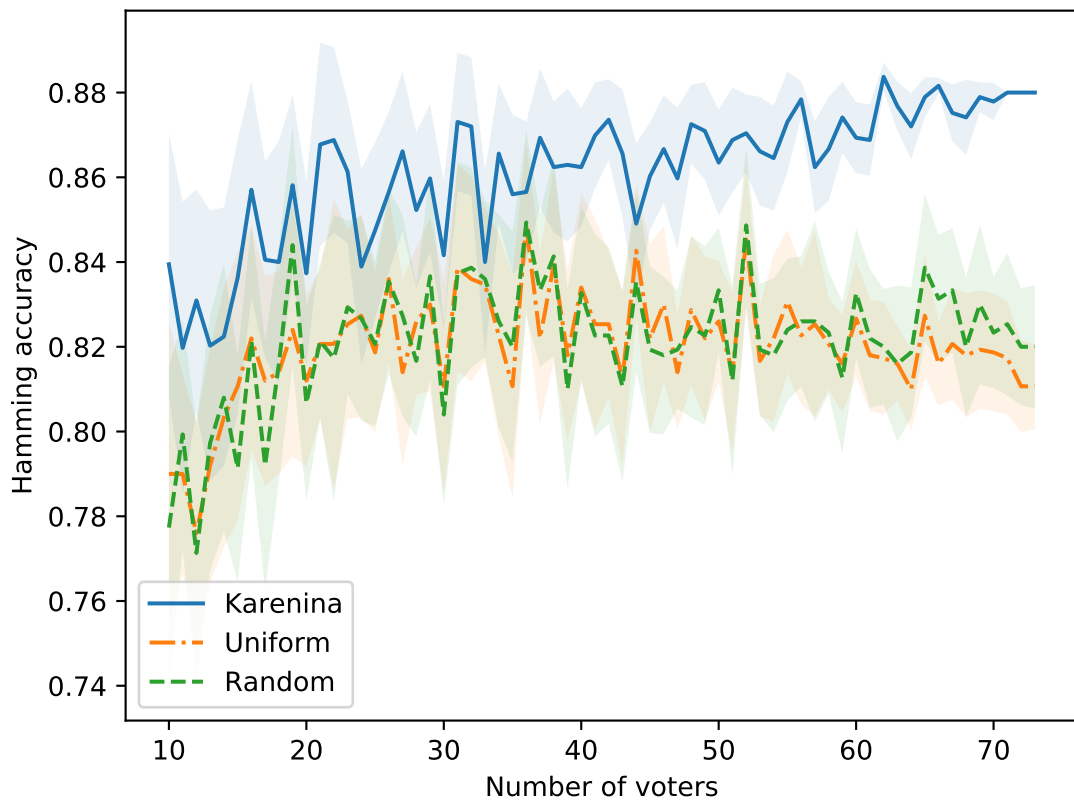

Supplement: supplementary_material [file attachment]

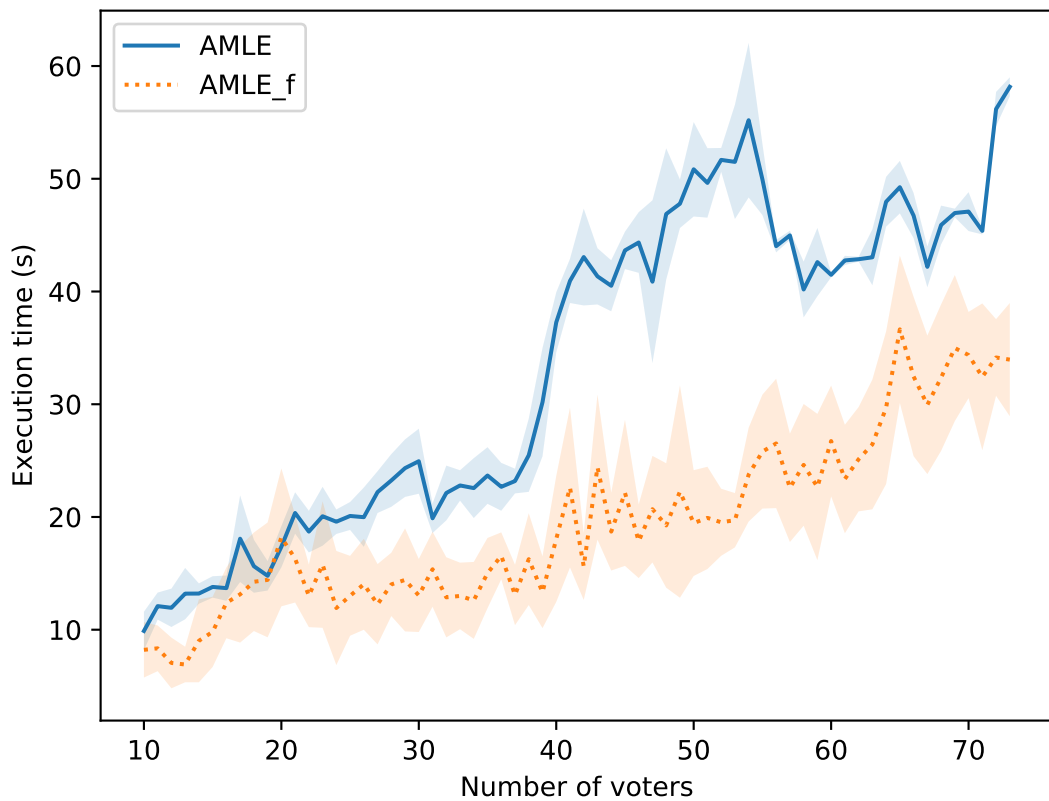

Supplement: supplementary_material [file attachment]

Histogram of the answers' sizes for questions with a single-winner

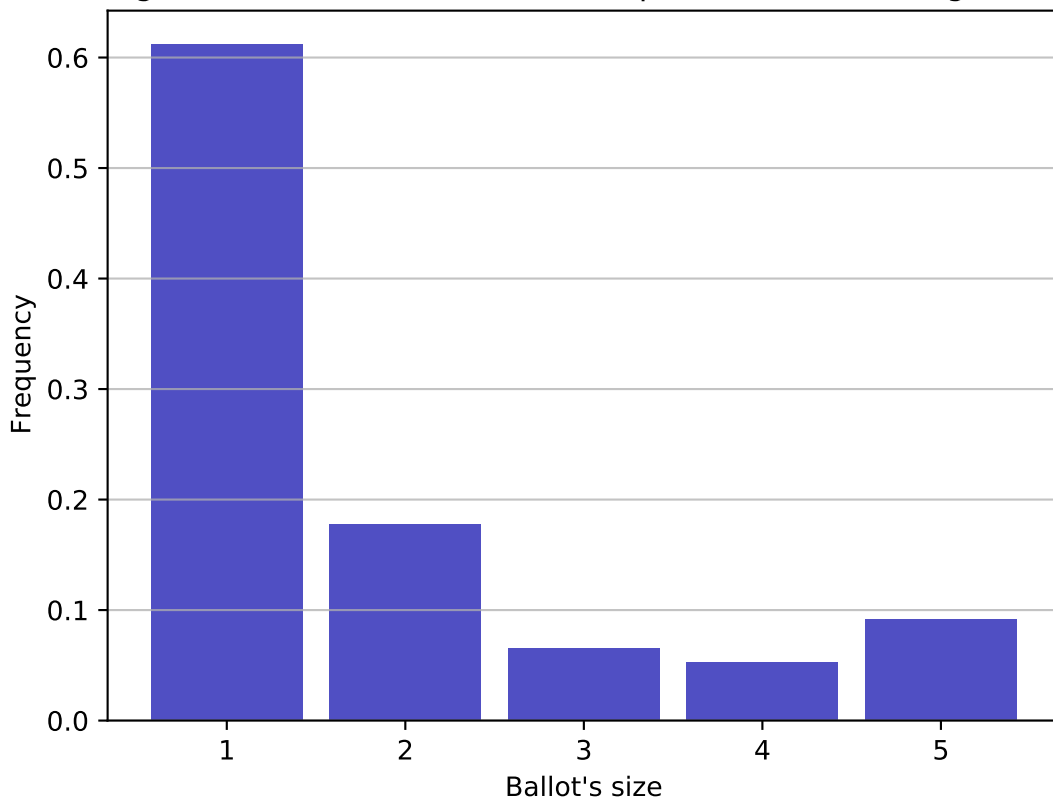

Supplement: supplementary_material [file attachment]

Hamming Accuracy

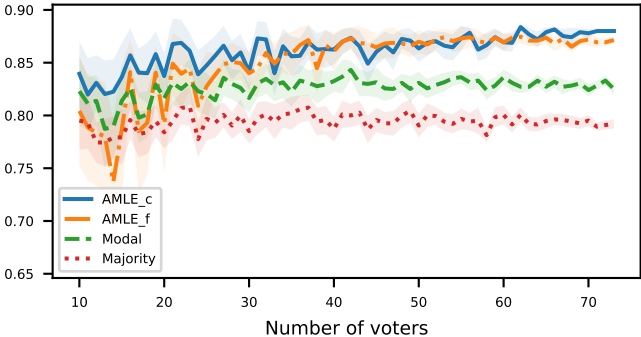

Supplement: supplementary_material [file attachment]

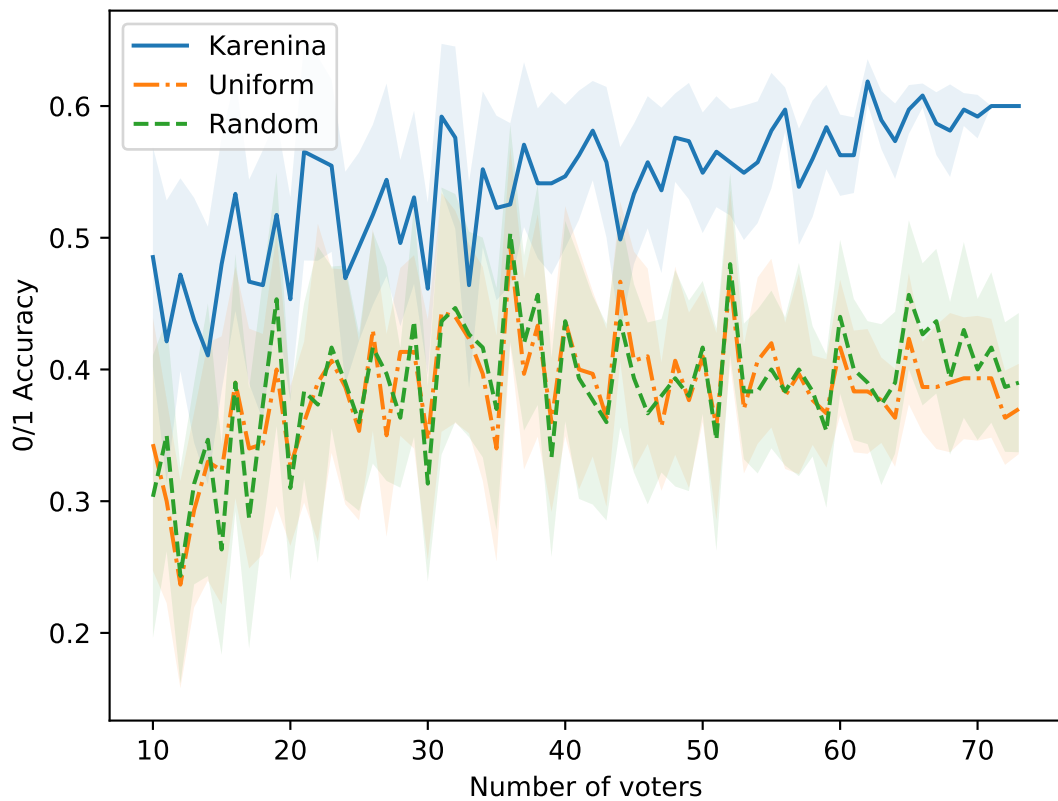

Supplement: supplementary_material [file attachment]
